# Supplementary material for: Exploring Hydrothermal Synthesis of SAPO-18 under High Hydrostatic Pressure
Source: MDPI journal article supplement (doi:10.3390/nano12030396), 2022-01-26
Supplement: s1 [file s1]

## Supplementary Materials

### Exploring hydrothermal synthesis of SAPO-18 under high hydrostatic pressure

### Exploring Hydrothermal Synthesis of SAPO-18 under High Hydrostatic Pressure

Raquel Simancas <sup>1,†</sup>, Masamori Takemura <sup>2,†</sup>, Yasuo Yonezawa <sup>1</sup>, Sohei Sukenaga <sup>3</sup>, Mariko Ando <sup>4</sup>, Hiroyuki Shibata <sup>3</sup>, Anand Chokkalingam <sup>1</sup>, Kenta Iyoki <sup>2</sup>, Tatsuya Okubo <sup>2</sup> and Toru Wakihara <sup>1,2,\*</sup>

<sup>1</sup> Institute of Engineering Innovation, The University of Tokyo, 2-11-16 Yayoi, Bunkyo-ku, Tokyo 113-8656, Japan; rsimancas@chemsys.t.u-tokyo.ac.jp (R.S.); yone-  
rice@chemsys.t.u-tokyo.ac.jp (Y.Y.);  
anand@chemsys.t.u-tokyo.ac.jp (A.C.)

<sup>2</sup> Department of Chemical System Engineering, The University of Tokyo, 7-3-1 Hongo, Bunkyo-ku, Tokyo 13-8656, Japan; takem003@chemsys.t.u-tokyo.ac.jp (M.T.); k\_iyoki@chemsys.t.u-tokyo.ac.jp (K.I.); okubo@chemsys.t.u-tokyo.ac.jp (T.O.)

<sup>3</sup> Institute of Multidisciplinary Research for Advanced Materials, Tohoku University, Sendai 980-8577, Japan; sohei.sukenaga.d3@tohoku.ac.jp (S.S.); hiroyuki.shibata.e8@tohoku.ac.jp (H.S.)

<sup>4</sup> Graduate School of Engineering, Tohoku University, Sendai 980-8579, Japan; mariko.ando.b2@tohoku.ac.jp

\* Correspondence: wakihara@chemsys.t.u-tokyo.ac.jp

† These authors contributed equally to this work.

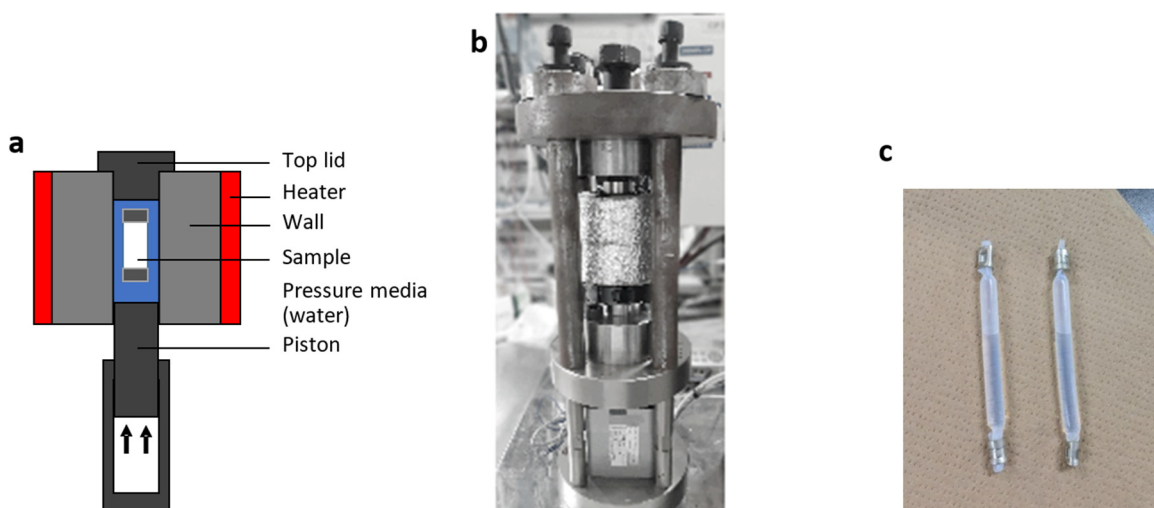

**Figure S1.** Schematic illustration (a) and photo (b) of the home-made warm isostatic press, and photos of the Teflon® reactor (c).

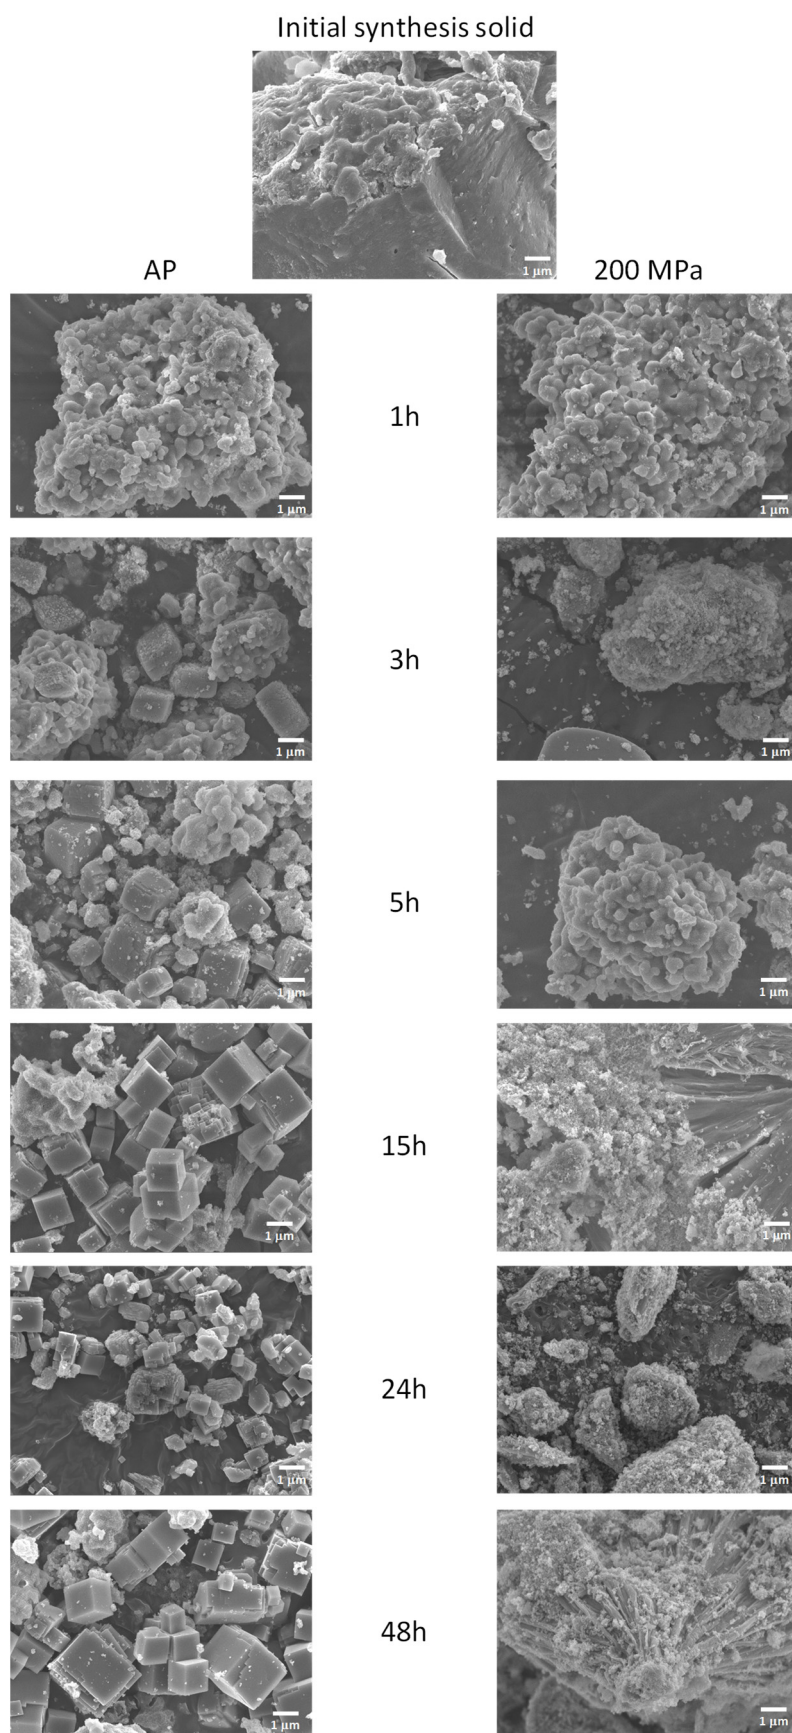

**Figure S2.** SEM images of the initial synthesis solid and the solids obtained under autogenous (AP) and 200 MPa at 150°C for different time using the diluted synthesis mixture ( $\text{H}_2\text{O}/\text{Al}_2\text{O}_3=50$ ).

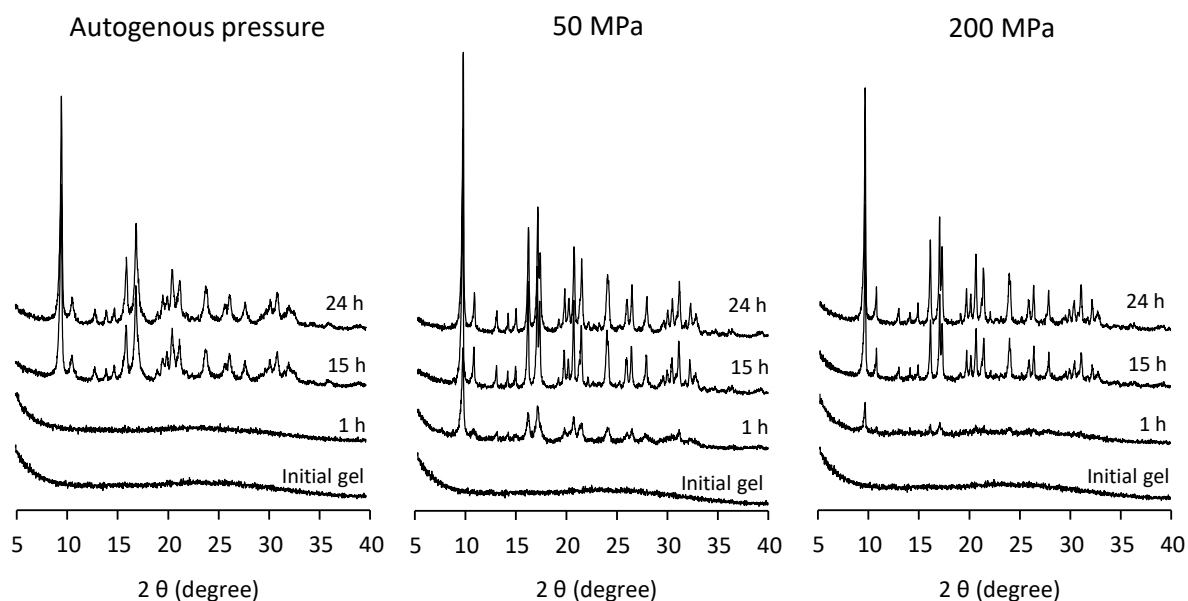

**Figure S3.** XRD patterns of the obtained solids under autogenous pressure, 50 MPa and 200 MPa at 150 °C for 1 to 72 h using the concentrated synthesis mixture ( $\text{H}_2\text{O}/\text{Al}_2\text{O}_3=9$ ).

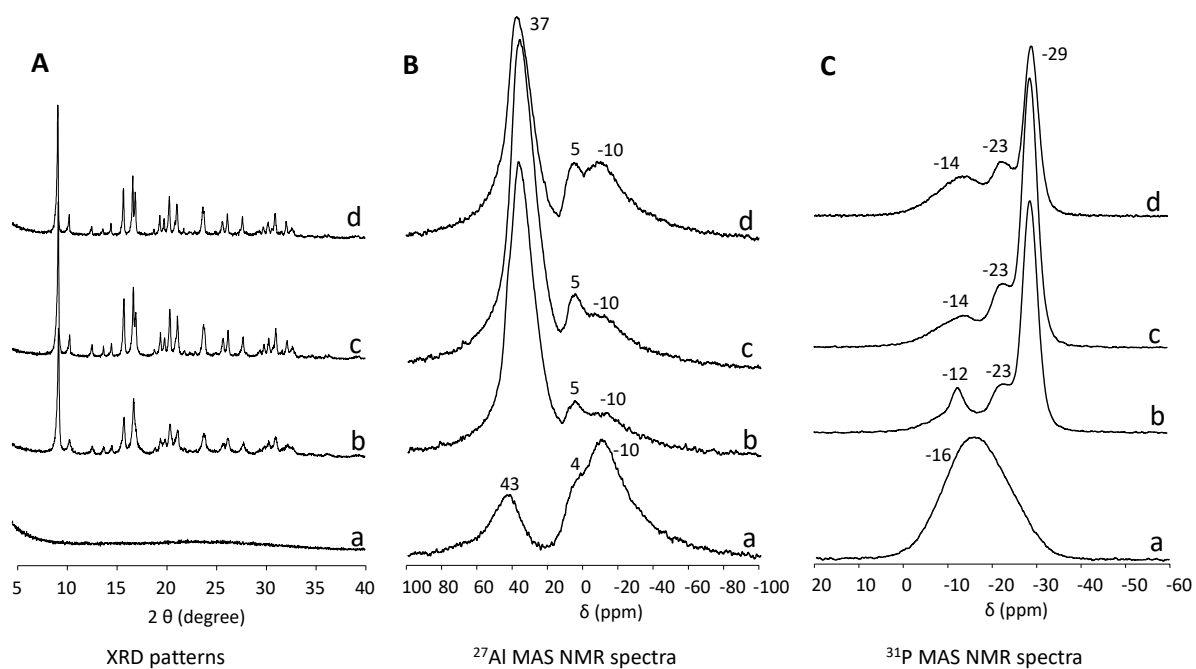

**Figure S4.** XRD patterns (A), and  $^{27}\text{Al}$  (B) and  $^{31}\text{P}$  (C) MAS NMR spectra of the synthesis mixture before heating (a), and as-made solids obtained under autogenous pressure (b), 50 MPa (c) and 200 MPa (d) at 150°C for 24 h using the concentrated synthesis mixture ( $\text{H}_2\text{O}/\text{Al}_2\text{O}_3=9$ ).

**Table S1.** Chemical analysis of the samples obtained at 150°C for different time using the synthesis mixture composition 1.6 DIPEA : 0.60 SiO<sub>2</sub> : 1.0 Al<sub>2</sub>O<sub>3</sub> : 0.90 P<sub>2</sub>O<sub>5</sub> : 50 H<sub>2</sub>O.

| Sample      | Al (mol%) | P (mol%) | Si (mol%) | Al/P | Si/(Si+Al+P) | (Si+P)/Al |
|-------------|-----------|----------|-----------|------|--------------|-----------|
| Initial gel | 61        | 28       | 11        | 2.2  | 0.11         | 0.63      |
| AP 1h       | 62        | 29       | 9         | 2.2  | 0.09         | 0.61      |
| AP 3h       | 58        | 33       | 10        | 1.8  | 0.10         | 0.73      |
| AP 5h       | 54        | 35       | 12        | 1.5  | 0.12         | 0.87      |
| AP 15h      | 55        | 38       | 7         | 1.5  | 0.07         | 0.82      |
| AP 1d       | 52        | 41       | 7         | 1.3  | 0.07         | 0.92      |
| AP 2d       | 51        | 41       | 8         | 1.3  | 0.08         | 0.95      |
| AP 3d       | 49        | 42       | 9         | 1.2  | 0.09         | 1.03      |
| 50MPa 1h    | 61        | 35       | 4         | 1.7  | 0.03         | 0.63      |
| 50MPa 3h    | 56        | 36       | 7         | 1.6  | 0.07         | 0.78      |
| 50MPa 5h    | 58        | 36       | 6         | 1.6  | 0.06         | 0.74      |
| 50MPa 15h   | 53        | 33       | 14        | 1.6  | 0.14         | 0.89      |
| 50MPa 1d    | 56        | 35       | 9         | 1.6  | 0.09         | 0.78      |
| 50MPa 2d    | 52        | 39       | 9         | 1.4  | 0.09         | 0.91      |
| 50MPa 3d    | 50        | 37       | 12        | 1.3  | 0.12         | 0.73      |
| 200MPa 1h   | 58        | 32       | 10        | 1.8  | 0.10         | 0.67      |
| 200MPa 3h   | 60        | 27       | 13        | 2.2  | 0.13         | 0.67      |
| 200MPa 5h   | 60        | 33       | 7         | 1.8  | 0.07         | 0.80      |
| 200MPa 15h  | 56        | 34       | 11        | 1.6  | 0.11         | 1.04      |
| 200MPa 1d   | 49        | 31       | 21        | 1.6  | 0.21         | 0.69      |
| 200MPa 2d   | 59        | 30       | 11        | 2.0  | 0.11         | 0.99      |
| 200MPa 3d   | 50        | 35       | 15        | 1.4  | 0.15         | 0.73      |

**Table S2.** Chemical analysis of the samples obtained at 150°C for different time using the synthesis mixture composition 1.6 DIPEA : 0.60 SiO<sub>2</sub> : 1.0 Al<sub>2</sub>O<sub>3</sub> : 0.90 P<sub>2</sub>O<sub>5</sub> : 9 H<sub>2</sub>O.

| Sample      | Al (mol%) | P (mol%) | Si (mol%) | Al/P | Si/(Si+Al+P) | (Si+P)/Al |
|-------------|-----------|----------|-----------|------|--------------|-----------|
| Initial gel | 50        | 34       | 16        | 1.5  | 0.16         | 0.99      |
| AP 1h       | 54        | 30       | 16        | 1.8  | 0.16         | 0.85      |
| AP 15h      | 48        | 42       | 11        | 1.1  | 0.11         | 1.10      |
| AP_1d       | 46        | 42       | 12        | 1.1  | 0.12         | 1.16      |
| 50MPa 1h    | 64        | 33       | 3         | 1.9  | 0.03         | 0.57      |
| 50MPa 15h   | 50        | 43       | 7         | 1.2  | 0.07         | 1.01      |
| 50MPa_1d    | 49        | 42       | 9         | 1.2  | 0.09         | 1.06      |
| 200MPa 1h   | 53        | 33       | 15        | 1.6  | 0.15         | 0.90      |
| 200MPa 15h  | 49        | 39       | 12        | 1.3  | 0.12         | 1.05      |
| 200MPa_1d   | 49        | 39       | 13        | 1.2  | 0.13         | 1.06      |
